# Supplementary material for: Protocol to identify multiple protein targets and therapeutic compounds using an in silico polypharmacological approach
Source: PubMed Central journal article supplement — STAR Protoc. 2023 Aug 9;4(3):102440. doi: 10.1016/j.xpro.2023.102440 (PMC10440594; doi:10.1016/j.xpro.2023.102440), 2023-08-09

## Methods S1: Workflow diagram of the entire protocol to identify multiple protein targets and therapeutic compounds using an in silico polypharmacological approach

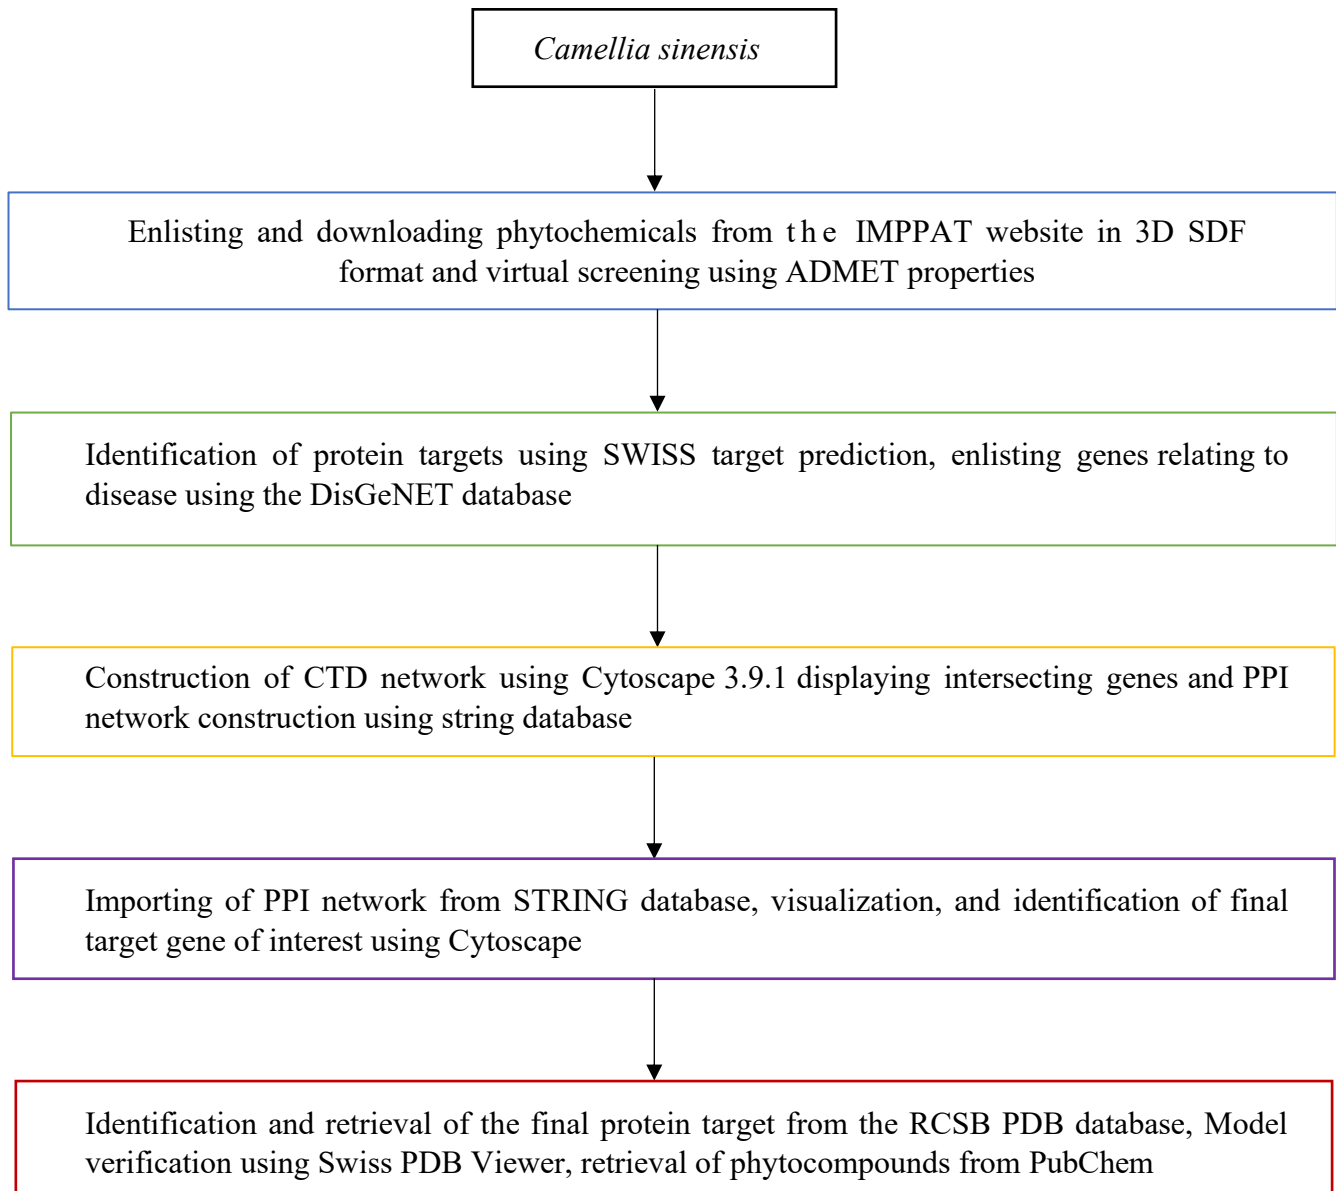

Supplement: mmc1.pdf [file mmc1.pdf]
